# Supplementary material for: Host Genetic Variants Linked to COVID-19 Neurological Complications and Susceptibility in Young Adults—A Preliminary Analysis
Source: MDPI journal article supplement (doi:10.3390/jpm13010123), 2023-01-06
Supplement: s1 [file s1]

**Table S1.** A set of SNPs selected for the association analysis of COVID-19-related phenotypes in the present study.

| SNP         | Gene Name                 | Chr:position<br>(GRCh37) | EA/NEA | Proxy<br>GWAS SNP | HWE<br><i>p</i> -value | EA/NEA<br>GWAS | Phenotype               | Reference |
|-------------|---------------------------|--------------------------|--------|-------------------|------------------------|----------------|-------------------------|-----------|
| rs1405655   | <i>NR1H2</i>              | 19:50882619              | C/T    | -                 | 0.80                   | C/T            | Hospitalized,<br>AD     | [1,2]     |
| rs2109069   | <i>DPP9</i>               | 19:4719443               | A/G    | -                 | 0.46                   | A/G            | dementia                | [1,3]     |
| rs35705950  | <i>MUC5B</i>              | 11:1241221               | T/G    | -                 | 0.22                   | T/G            | Hospitalized,<br>AD     | [1,2]     |
| rs505922    | <i>ABO</i>                | 9:136149229              | C/T    | -                 | 0.80                   | T/C            | dementia                | [1]       |
| rs10735079  | <i>OAS3</i>               | 12:113380008             | G/A    | -                 | 1                      | G/A            | dementia                | [3]       |
| rs2304256   | <i>TYK2</i>               | 19:10475652              | A/C    | rs11085727        | 1                      | T/C            | dementia                | [3]       |
| rs114067890 | <i>SMRR1</i>              | 1:24999518               | G/A    | rs111972040       | 1                      | G/A            | dementia                | [3]       |
| rs12329760  | <i>TMPRSS2</i>            | 21:42852497              | T/C    | -                 | 0.31                   | T/C            | dementia                | [3]       |
| rs112640945 | <i>CCHCR1</i>             | 6:31117673               | T/C    | rs143334143       | 0.11                   | A/G            | dementia                | [3]       |
| rs4290734   | <i>TMPRSS2</i>            | 21:42853083              | G/A    | rs17854725        | 0.10                   | A/G            | dementia                | [3]       |
| rs3131294   | <i>NOTCH4</i>             | 6:32180146               | A/G    | -                 | 0.27                   | A/G            | dementia                | [3]       |
| rs769449    | <i>APOE</i>               | 19:45410002              | A/G    | rs429358          | 0.53                   | C/T            | dementia                | [3]       |
| rs61735789  | <i>TMPRSS2</i>            | 21:42852435              | A/G    | -                 | 0.01                   | A/G            | dementia                | [3]       |
| rs117696554 | <i>TMPRSS2</i>            | 21:42860532              | A/G    | rs61735794        | <0.01                  | T/C            | dementia                | [3]       |
| rs1894401   | <i>FURIN</i>              | 15:91429042              | G/A    | rs6226            | 1                      | G/C            | dementia                | [3]       |
| rs4766664   | <i>OAS1</i>               | 12:113362997             | T/G    | rs6489867         | 0.75                   | C/T            | dementia                | [3]       |
| rs657152    | <i>ABO</i>                | 9:136139265              | A/C    | -                 | 0.04                   | A/C            | dementia                | [3]       |
| rs10911734  | <i>IVNS1ABP,<br/>SWT1</i> | 1:185422424              | T/C    | rs6668622         | 0.49                   | C/T            | dementia                | [3]       |
| rs17078348  | <i>LZTFL1</i>             | 3:45847241               | G/A    | rs71325088        | 0.73                   | C/T            | dementia                | [3]       |
| rs7412      | <i>APOE</i>               | 19:45412079              | T/C    | -                 | 0.08                   | T/C            | dementia                | [3]       |
| rs2838046   | <i>TMPRSS2</i>            | 21:42898366              | G/A    | rs75603675        | <0.01                  | A/C            | dementia                | [3]       |
| rs9380142   | <i>HLA-G</i>              | 6:29798794               | G/A    | -                 | 0.19                   | G/A            | dementia                | [3]       |
| rs2531743   | <i>SLC6A20</i>            | 3:45838300               | A/G    | -                 | 0.06                   | A/G            | Hospitalized,<br>AD     | [2]       |
| rs45524632  | <i>KEAP1</i>              | 19:10596988              | A/C    | -                 | 0.39                   | A/C            | critical illness,<br>AD | [2]       |

|          |     |             |     |   |       |     |                         |     |
|----------|-----|-------------|-----|---|-------|-----|-------------------------|-----|
| rs635634 | ABO | 9:136155000 | T/C | - | <0.01 | T/C | critical illness,<br>AD | [2] |
|----------|-----|-------------|-----|---|-------|-----|-------------------------|-----|

EA/NEA – effect (minor) allele/non-effect (major) allele; AD – Alzheimer’s disease.

#### References:

1. COVID-19 Host Genetics Initiative. Mapping the Human Genetic Architecture of COVID-19. *Nature* **2021**, 600, 472–477. <http://doi:10.1038/s41586-021-03767-x>.
2. Baranova, A.; Cao, H.; Zhang, F. Causal Effect of COVID-19 on Alzheimer’s Disease: A Mendelian Randomization Study. *J. Med. Virol.* **2022**, <http://doi:10.1002/jmv.28107>.
3. de Rojas, I.; Hernández, I.; Montreal, L.; Quintela, I.; Calero, M.; Royo, J.L.; Huerto Vilas, R.; González-Pérez, A.; Franco-Macías, E.; Macías, J.; et al. Genomic Characterization of Host Factors Related to SARS-CoV-2 Infection in People with Dementia and Control Populations: The GR@ACE/DEGESCO Study. *J. Pers. Med.* **2021**, 11. <http://doi:10.3390/jpm11121318>.
